# Supplementary material
Source: PubMed Central journal article supplement (PMC7610380)

Suv39h1

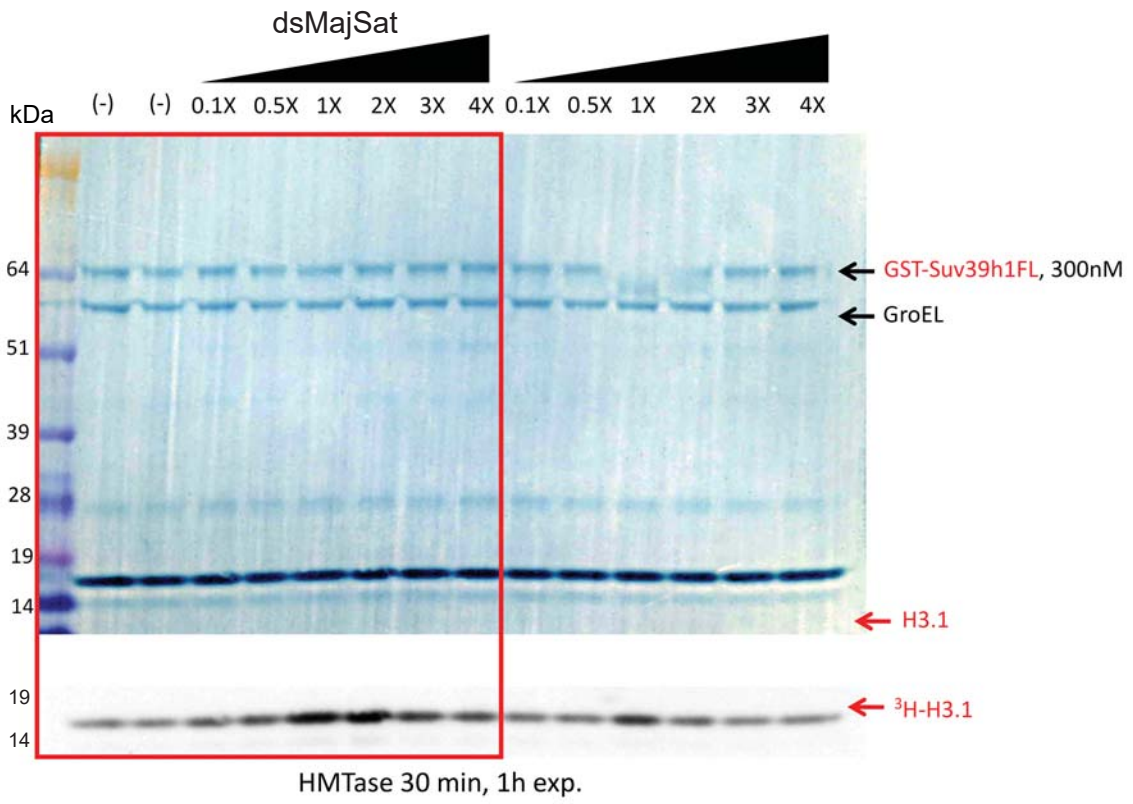

Autoradiography

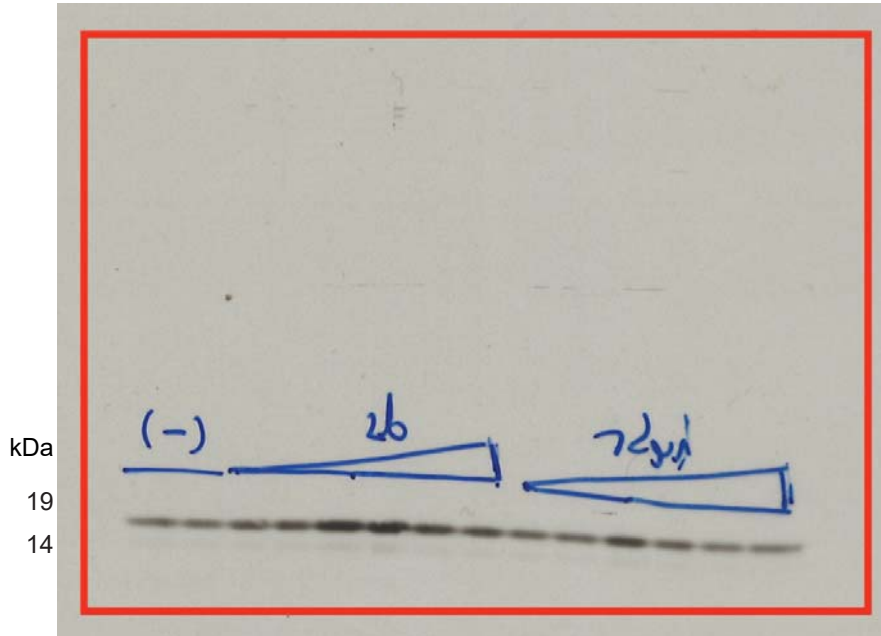

Suv39h2

dsMajSat

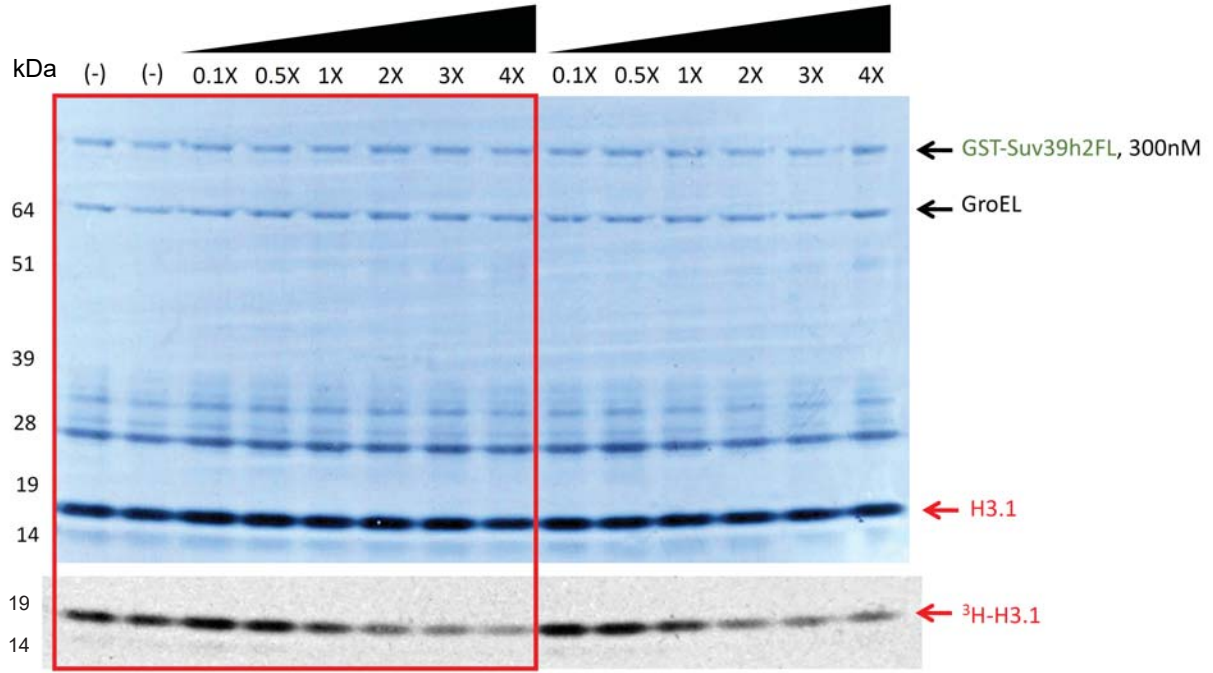

HMTase 30 min, 1h exp.

Autoradiography

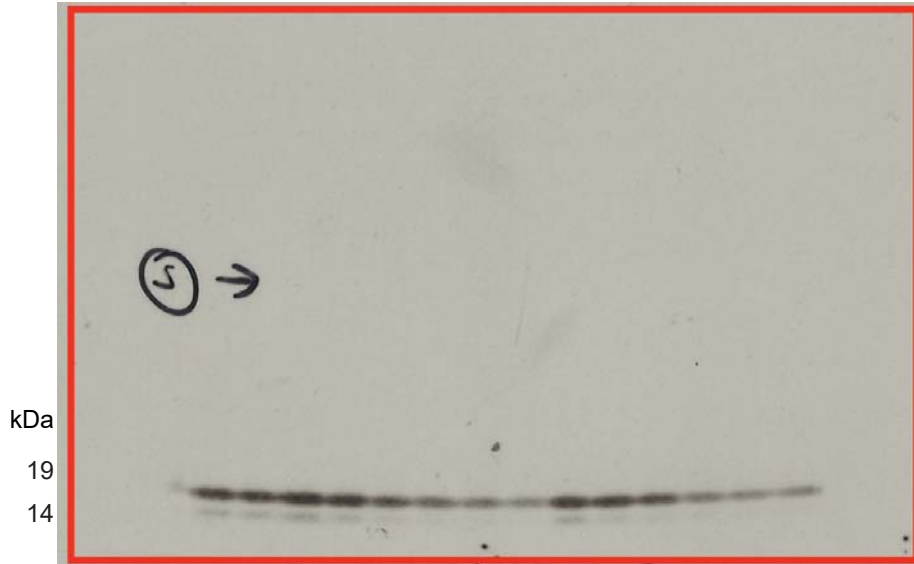

Supplement: EMS118800-supplement-Burton_Source_Data_Main_Figure_2c.pdf [file EMS118800-supplement-Burton_Source_Data_Main_Figure_2c.pdf]
